# Supplementary material
Source: PubMed Central journal article supplement (PMC3688655)

## SUPPLEMENTAL MATERIAL

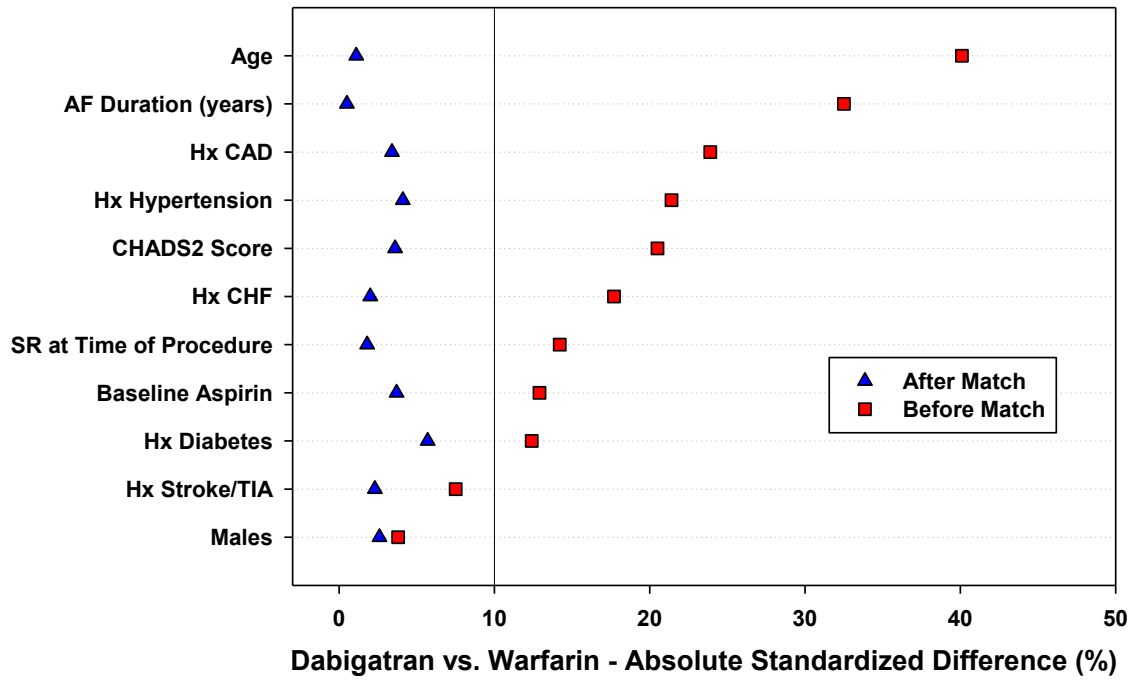

Supplemental Figure 1. Bias reduction by propensity score matching

Supplement: NIHMS473864-supplement-Supplementary_Data.pdf [file NIHMS473864-supplement-Supplementary_Data.pdf]
